# Supplementary material for: Identification of influenza polymerase inhibitors targeting C-terminal domain of PA through surface plasmon resonance screening
Source: PubMed Central journal article supplement (PMC5797126; doi:10.1038/s41598-018-20772-9), 2018-02-02
Supplement: 41598_2018_20772_MOESM1_ESM.pdf [file 41598_2018_20772_MOESM1_ESM.pdf]

## **Supplementary Information**

### **Identification of influenza polymerase inhibitors targeting C-terminal domain of PA through surface plasmon resonance screening**

Chun-Yeung Lo, Olive Tin-Wai Li, Wen-Ping Tang, Chun Hu, Guo Xin Wang, Jacky Chi-Ki Ngo, David Chi-Cheong Wan, Leo Lit-Man Poon, Pang-Chui Shaw\*

\* Corresponding Author

## Supplementary Figure

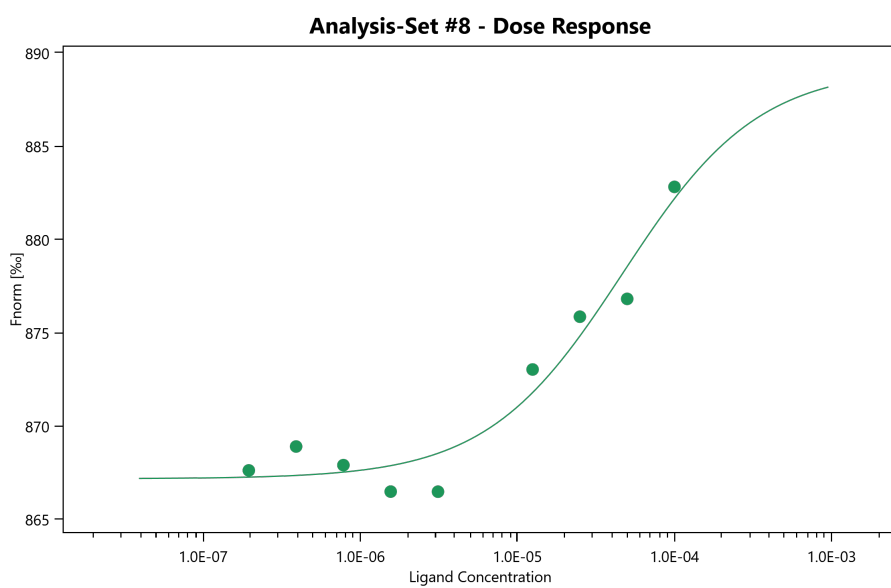

**Figure S1.** MST study of compound **387** with PAC.

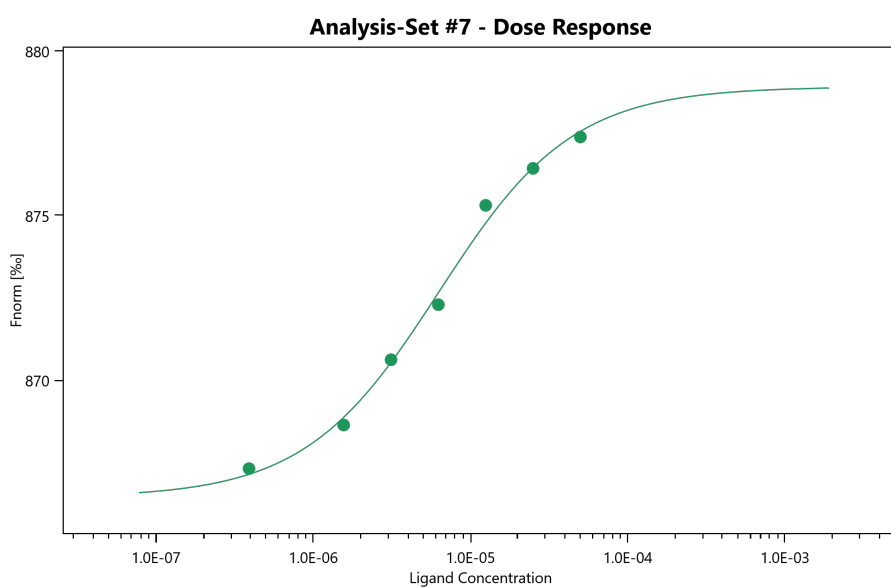

**Figure S2.** MST study of compound **392** with PAC.

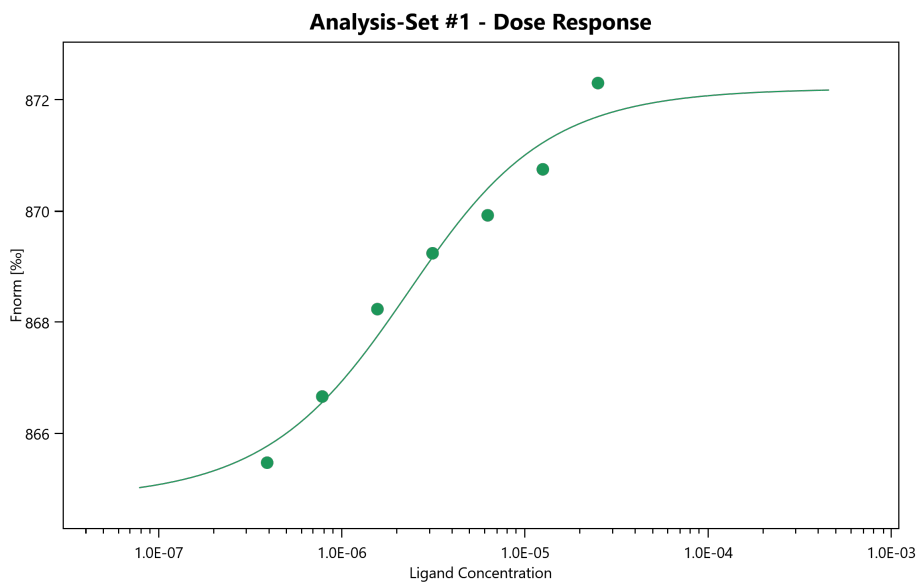

**Figure S3.** MST study of compound **S2a** with PAC.

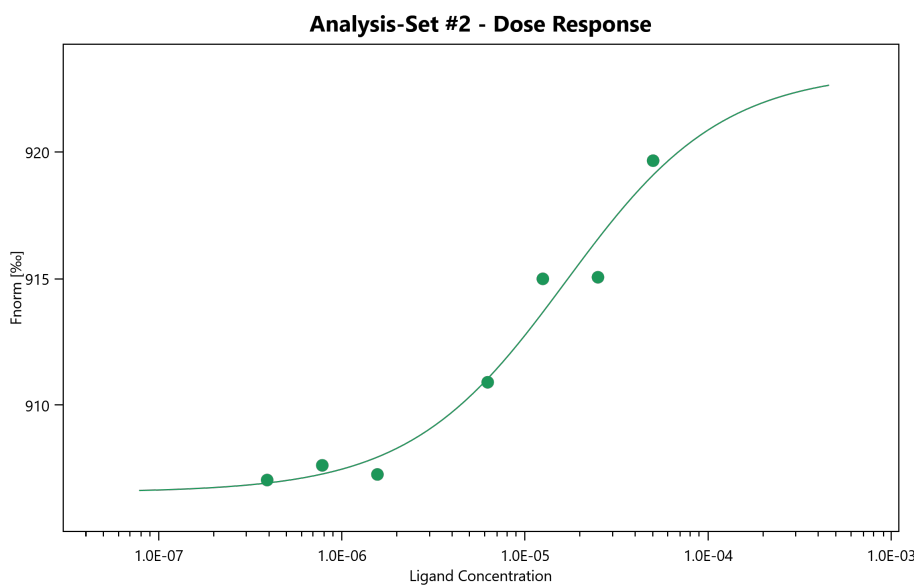

**Figure S4.** MST study of compound **S2b** with PAC.

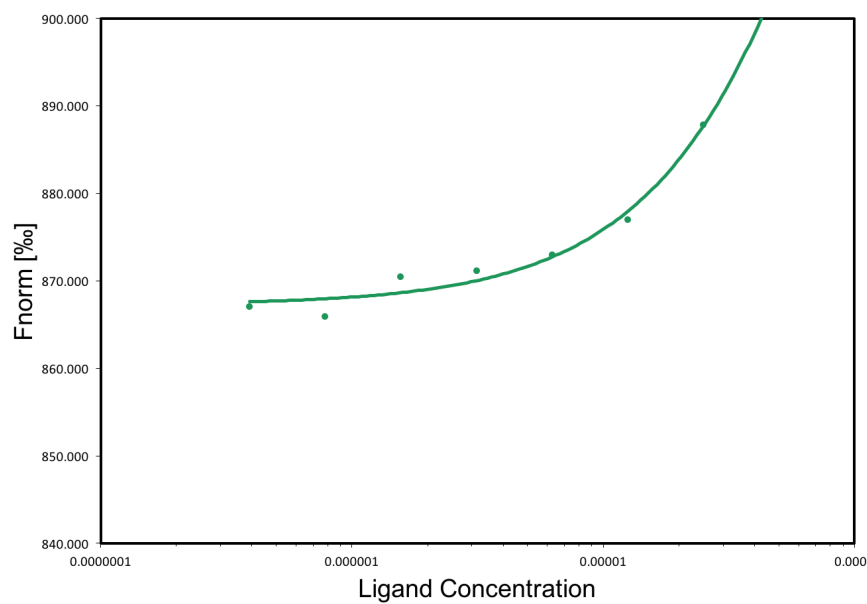

**Figure S5.** MST study of compound S2d with PAC.

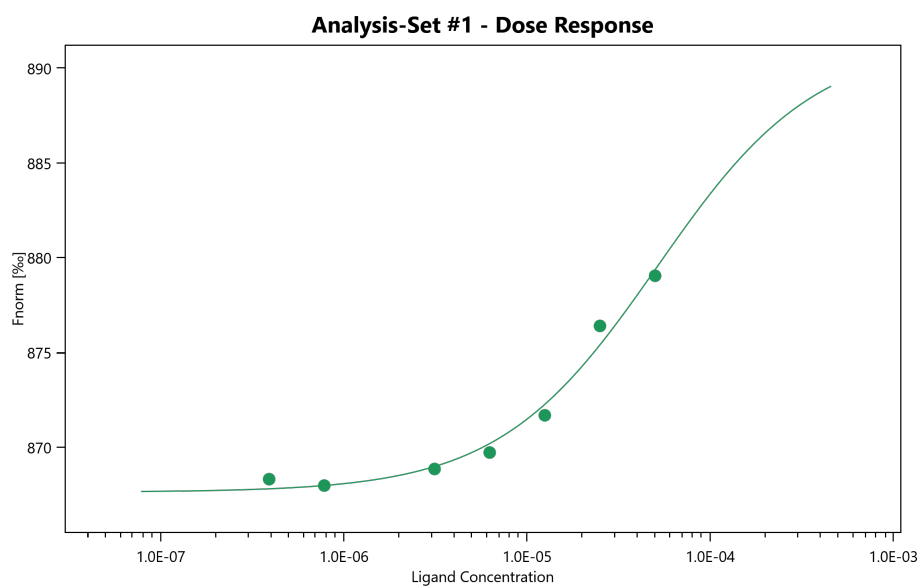

**Figure S6.** MST study of compound S2e with PAC.

```

H5N1 257      IEPFLKTTPRPLRLPDGPPCSQRSKFLLMDALKLSIEDPSHEGE
H1N1          IEPFLKSTPRPLRLPDGPPCSQRSKFLLMDALKLSIEDPSHEGE
H2N2          IEPFLKTTPRPIRLPDGPPCSQRSKFLLMDALKLSIEDPSHEGE
H3N2          IEPFLKTTPRPIRLPDGPPCFQRSKFLLMDALKLSIEDPSHEGE
              *****:****:***** *****

H5N1 301      GIPLYDAIKCMRTFFGWKEPNIKPKHEKGINPNYLLWKQVLAELQDIENEKIPRTKNM
H1N1          GIPLYDAIKCMRTFFGWKEPNVVKPHEKGINPNYLLSWKQVLAELQDIENEKIPRTKNM
H2N2          GIPLYDAIKCMRTFFGWKEPYVVKPHEKGINPNYLLSWKQVLAELQDIENEKIPRTKNM
H3N2          GIPLYDAIKCMRTFFGWKEPYIVKPKHEKGINPNYLLSWKQVLAELQDIENEKIPRTKNM
              *****:****:***:*****:*****:*****:*****:*****

H5N1 361      KKTSQLKQWALGENMAPEKVDFFDCKDIDDLKQYDSDEPELRSLSWIQNEFNKACELTDS
H1N1          KKTSQLKQWALGENMAPEKVDFFDCKDIDDLKQYDSDEPELRSLSWIQNEFNKACELTDS
H2N2          KKTSQLKQWALGENMAPEKVDFFDCCRDTSDLKQYDSDEPELRSLSWIQNEFNKACELTDS
H3N2          KKTSQLKQWALGENMAPEKVDFFDNCRDVSDLKQYDSDEPELRSLSWIQNEFNKACELTDS
              ***** *****:***:***** ***** *****:*****

H5N1 421      SWIELDEIGEDVAPIEHIASMRNYFTAESHCRATEYIMKGVYINTALLNASCAAMDDF
H1N1          SWIELDEIGEDAAPIEHIASMRNYFTAESHCRATEYIMKGVYINTALLNASCAAMDDF
H2N2          IWIELDEIGEDVAPIEHIASMRNYFTAESHCRATEYIMKGVYINTALLNASCAAMDDF
H3N2          TWIELDEIGEDVAPIEYIASMRNYFTAESHCRATEYIMKGVYINTALLNASCAAMDDF
              *****:****:***** *****

H5N1 481      QLIPMISKRCRTKEGRRKTNLYGFIKGRSHLRNDTDVVNFVSMEFSLTDPRLPHKWEKY
H1N1          QLIPMISKRCRTKEGRRKTNLYGFIKGRSHLRNDTDVVNFVSMEFSLTDPRLPHKWEKY
H2N2          QLIPMISKRCRTKEGRRKTNLYGFIKGRSHLRNDTDVVNFVSMEFSLTDPRLPHKWEKY
H3N2          QLIPMISKRCRTKEGRRKTNLYGFIKGRSHLRNDTDVVNFVSMEFSLTDPRLPHKWEKY
              *****:*****:***** *****

H5N1 541      CVLEIGDMLLRSAIGQVSRPMPFLYVRTNGTSGIKMKWGMEMRCLLQSLQQIESMIEAES
H1N1          CVLEVGDMLLRSAIGHVSRPMPFLYVRTNGTSGIKMKWGMEMRCLLQSLQQIESMIEAES
H2N2          CVLEIGDMLLRSAIGQVSRPMPFLYVRTNGTSGIKMKWGMEMRCLLQSLQQIESMIEAES
H3N2          CVLEIGDMLLRSAIGQMSRPMPFLYVRTNGTSGIKMKWGMEMRCLLQSLQQIESMIEAES
              *****:****:****:****:***** *****

H5N1 601      SVKEKDMTKEFFENKSETWPIGESPKGVEEGSIGKVCRTLLAKSVFNLSYASPOLEGFSA
H1N1          SVKEKDMTKEFFENKSETWPIGESPKGVEEGSIGKVCRTLLAKSVFNLSYASPOLEGFSA
H2N2          SVKEKDMTKEFFENKSETWPIGESPKGVEEGSIGKVCRTLLAKSVFNLSYASPOLEGFSA
H3N2          SVKEKDMTKEFFENKSETWPIGESPKGVEDGSIGKVCRTLLAKSVFNLSYASPOLEGFSA
              *:*****:*****:*****:*****:***** *****

H5N1 661      ESRKLLLVQALRDNLEPGTFDLEGLYEAIIEECLINDPWVLLNASWFNSFLTHALR
H1N1          ESRKLLLVQALRDNLEPGTFDLGGLYEAIIEECLINDPWVLLNASWFNSFLTHALR
H2N2          ESRKLLLVQALRDNLEPGTFDLGGLYEAIIEECLINDPWVLLNASWFNSFLTHALR
H3N2          ESRKLLLVQALRDNLEPGTFDLEGLYEAIIEECLINDPWVLLNASWFNSFLTHALR
              *****:***** ***** ***** *****

```

**Figure S7.** Sequence alignment of A/WSN/33 (H1N1), A/Japan/305/1957 (H2N2), A/HK/1/68 (H3N2) and A/HK/156/97 (H5N1) PAC. Distinct residues of H5N1 PAC are highlighted in red.

**Supplementary Table 1. Chemical structure of hit compounds from SPR screening.**

| Compound ID. | Chemical Structure                                                                  | Compound ID. | Chemical Structure                                                                   |
|--------------|-------------------------------------------------------------------------------------|--------------|--------------------------------------------------------------------------------------|
| 57           | 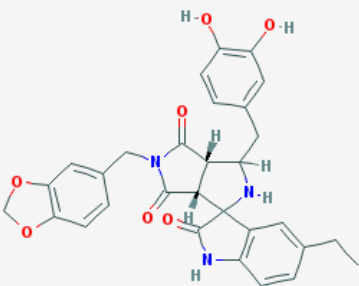   | 265          |   |
| 95           |   | 270          |   |
| 123          |  | 271          |  |

131

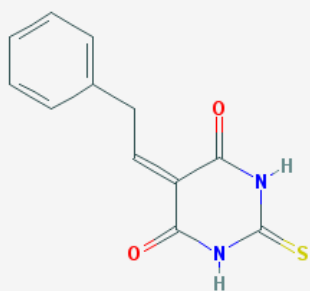

272

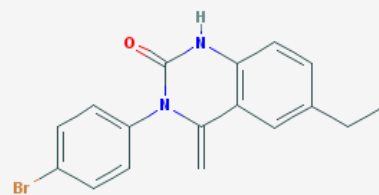

190

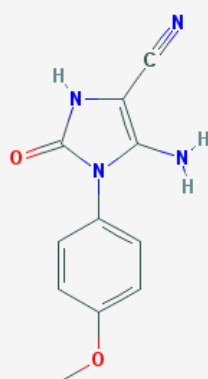

273

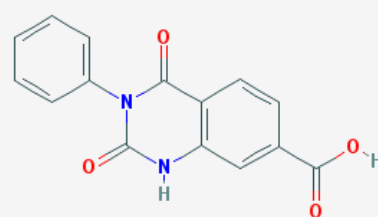

198

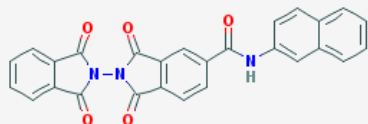

280

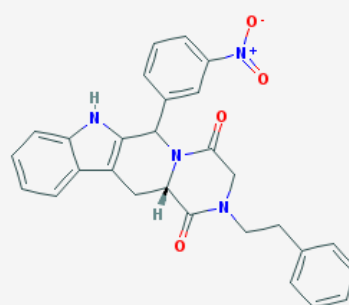

203

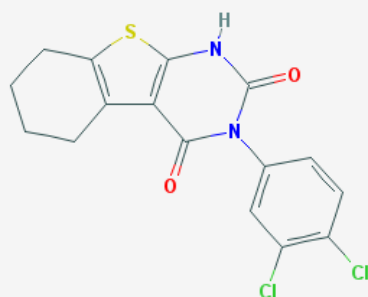

283

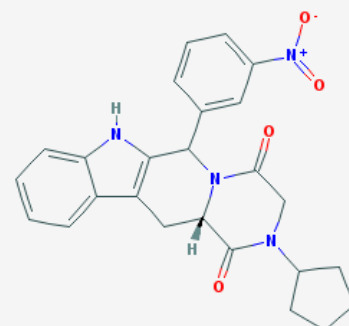

221

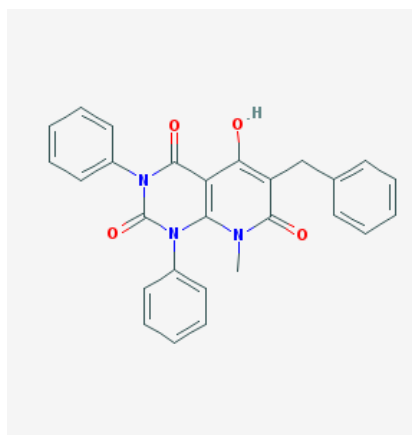

345

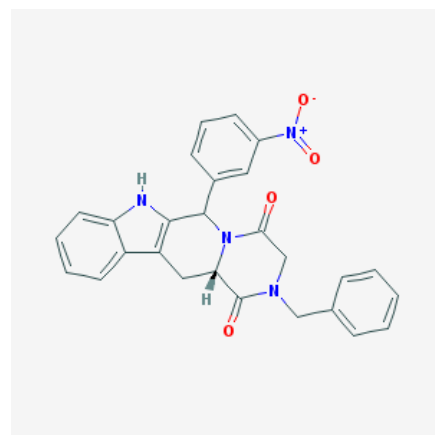

263

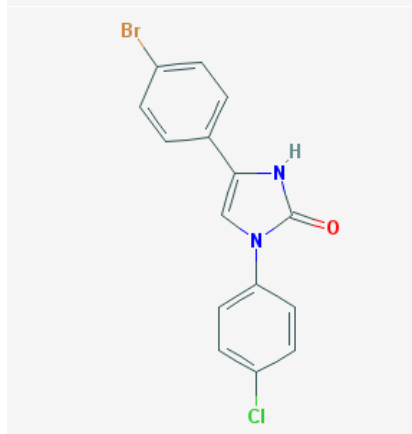



**Supplementary Table2. Cytotoxicity of compounds**

|                                                              |      | CC <sub>50</sub> <sup>a</sup> (μM) |              |
|--------------------------------------------------------------|------|------------------------------------|--------------|
| Compound                                                     |      | 293Ta                              | MDCK         |
| Hit compounds<br>from SPR<br>screening                       | 57   | >50                                | N.D.         |
|                                                              | 95   | >25                                | N.D.         |
|                                                              | 123  | >50                                | N.D.         |
|                                                              | 131  | >50                                | N.D.         |
|                                                              | 190  | >100                               | N.D.         |
|                                                              | 198  | >5                                 | N.D.         |
|                                                              | 203  | >100                               | N.D.         |
|                                                              | 221  | >100                               | >100         |
|                                                              | 263  | >100                               | N.D.         |
|                                                              | 265  | >100                               | N.D.         |
|                                                              | 270  | 82.0 ± 2.5                         | N.D.         |
|                                                              | 271  | >100                               | N.D.         |
|                                                              | 272  | >100                               | N.D.         |
|                                                              | 273  | >100                               | N.D.         |
|                                                              | 280  | >100                               | N.D.         |
|                                                              | 283  | >10                                | >10          |
| 345                                                          | >100 | N.D.                               |              |
| Analogues<br>obtained<br>through<br>chemical<br>modification | S1a  | >100                               | N.D.         |
|                                                              | S1b  | >100                               | >100         |
|                                                              | S1c  | >100                               | N.D.         |
|                                                              | S1d  | >100                               | N.D.         |
|                                                              | S2a  | 84.6 ± 17.30                       | >100         |
|                                                              | S2b  | >100                               | 42.8 ± 9.0   |
|                                                              | S2c  | 97.1 ± 16.10                       | N.D.         |
|                                                              | S2d  | 66.6 ± 6.09                        | 35.6 ± 9.24  |
|                                                              | S2e  | >100                               | 53.1 ± 9.25  |
| S2f                                                          | >100 | >100                               |              |
| Commercially<br>available<br>analog                          | 310  | >100                               | >100         |
|                                                              | 312  | >100                               | >100         |
|                                                              | 384  | >100                               | >100         |
|                                                              | 385  | >100                               | N.D.         |
|                                                              | 387  | >100                               | >100         |
|                                                              | 389  | >100                               | >100         |
|                                                              | 390  | >100                               | N.D.         |
|                                                              | 391  | >100                               | N.D.         |
|                                                              | 392  | 62.66 ± 18.7                       | 87.03 ± 7.22 |
|                                                              | 394  | >100                               | N.D.         |
|                                                              | 395  | >100                               | N.D.         |
| 396                                                          | >100 | N.D.                               |              |
| 397                                                          | >100 | N.D.                               |              |

<sup>a</sup>293T or MDCK cells were incubated with test compounds for 24 hrs; CC50 is the concentration of test compounds which produces 50% cytotoxicity as determined by MTT assays; N.D., not determined; reported values represent means  $\pm$  standard deviation of data from three independent experiments.
